# Supplementary material for: Homology models of the HIV-1 attachment inhibitor BMS-626529 bound to gp120 suggest a unique mechanism of action
Source: PubMed Central journal article supplement (PMC4681349; doi:10.1002/prot.24726), 2014-11-17
Supplement: prot0083-0331-sd1.pdf [file prot0083-0331-sd1.pdf]

## Supporting Information

**Figure S1.** Mean structure from the Accelerated MD simulations on the Set-1 poses bound with gp120 UNLIG. Overlay of the mean structure. The structures are colored by MD thermal factors. The color scale runs from blue (most stable) to red (least stable). The inset shows that BMS-626529 has nearly converged between the four different simulations with the caveat that the proteins have not. The Set-1:1 and 2 simulations show the tightest convergence. Set-1:3 and 4 differ somewhat from each other and from the Set-1:1 and 2 simulations.

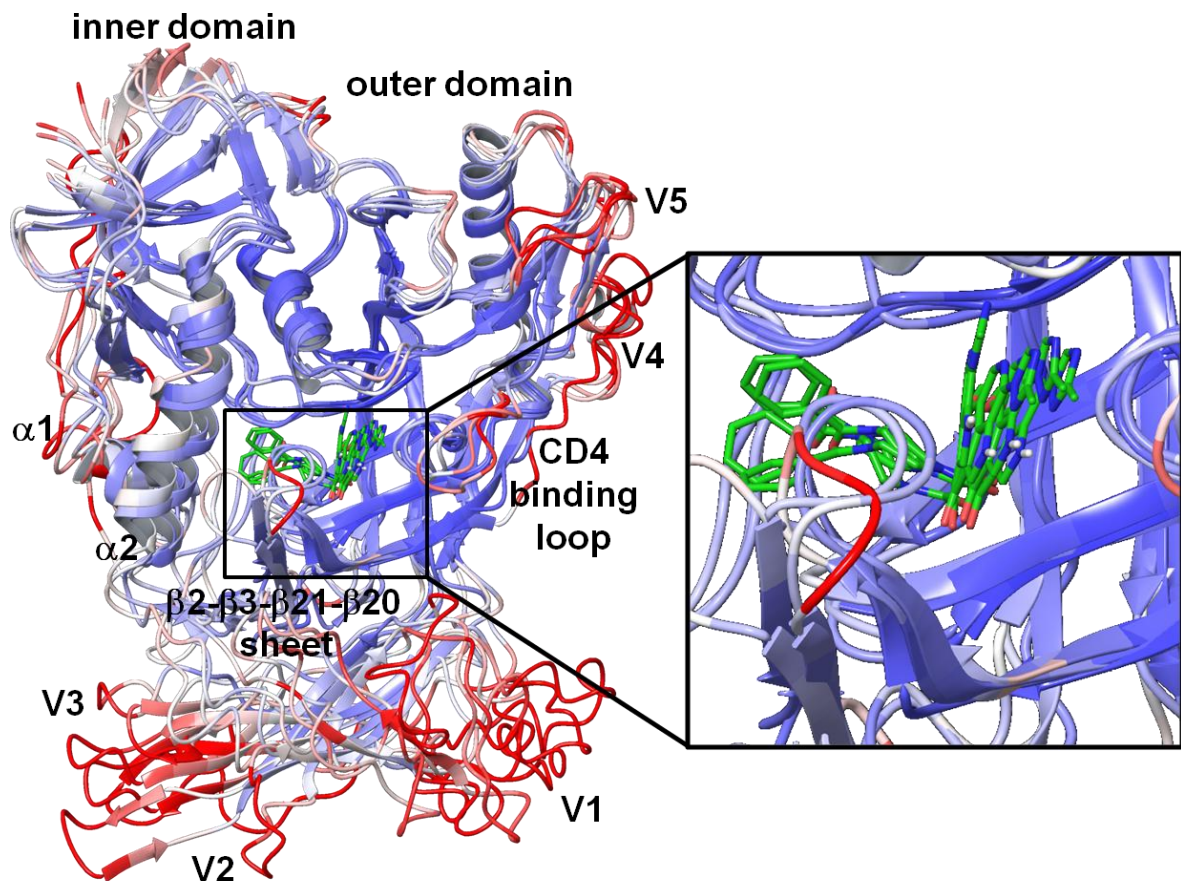

**Figure S2:** Mean structure from Set-1:1 and 2 simulations. Overlay of the mean structure from each simulation (averaged over 15–110-ns frames). The structures are colored by MD thermal factors. The color scale runs from blue (smallest fluctuation) to red (largest fluctuation). The inset shows that BMS-626529 has nearly converged between the two different simulations with the caveat that the proteins have not. Note that the piperazine ring is nearly flat in one structure and an up-chair in the other. The flat ring is due to averaging over multiple frames where nearly half the frames contain an up-chair while the other half contained the down-chair.

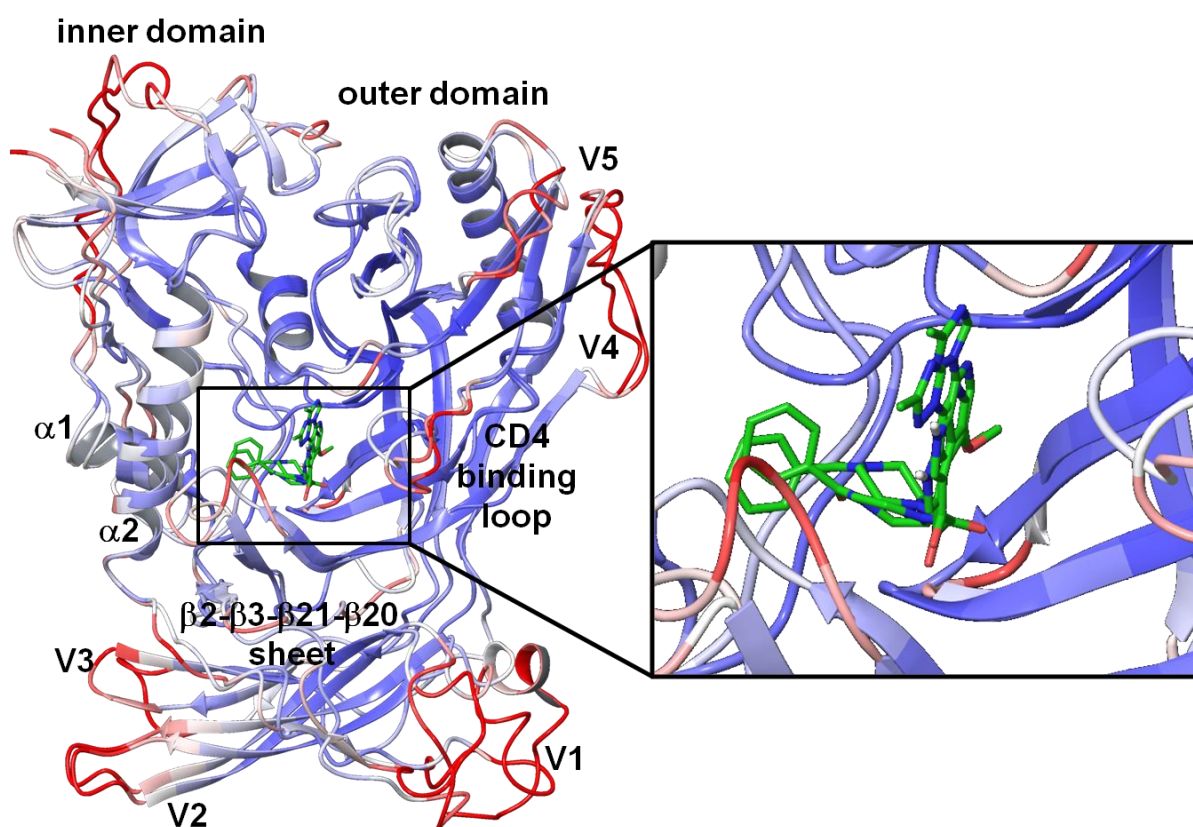

**Videos S3, S4, and S5** portray the last 10 ns of the MD simulations of BMS-626529 bound to the gp120 “closed” UNLIG state, models Set-1:1, Set-1:2, and Set-2:3, respectively. PDB files were extracted in 500 ps intervals from the MD simulation and morphed from one another by creating three intermediate frames through linear interpolation using a Python script. The frames were rendered in PyMol (The PyMol Molecular Graphics System Version 1.5.0.4, Schrödinger LLC) and saved as PNG files. The PNG files were assembled into the video using MPlayer (MPlayer Version 1.1.0 MPlayer Team). Inner domain (orange), outer domain (green), V1/V2 (yellow), V3 (pink),  $\beta$ 3– $\beta$ 2 sheet (light blue),  $\beta$ 20– $\beta$ 21 (blue), CD4 binding loop (red), BMS-626529 (maroon). Yellow dotted lines depict hydrogen bonds.

**Table S1: BMS-626529.pdb, BMS-626529.rtf, BMS-626529.prm files.**

|      |    |     |    |   |        |        |        |      |      |    |
|------|----|-----|----|---|--------|--------|--------|------|------|----|
| ATOM | 1  | C14 | L0 | 1 | -0.874 | -1.932 | 8.836  | 1.00 | 0.00 | L0 |
| ATOM | 2  | H13 | L0 | 1 | -0.471 | -1.880 | 7.828  | 1.00 | 0.00 | L0 |
| ATOM | 3  | C15 | L0 | 1 | -0.280 | -1.194 | 9.855  | 1.00 | 0.00 | L0 |
| ATOM | 4  | H14 | L0 | 1 | 0.610  | -0.603 | 9.655  | 1.00 | 0.00 | L0 |
| ATOM | 5  | C16 | L0 | 1 | -0.833 | -1.218 | 11.130 | 1.00 | 0.00 | L0 |
| ATOM | 6  | H15 | L0 | 1 | -0.352 | -0.675 | 11.939 | 1.00 | 0.00 | L0 |
| ATOM | 7  | C17 | L0 | 1 | -2.004 | -1.937 | 11.376 | 1.00 | 0.00 | L0 |
| ATOM | 8  | H16 | L0 | 1 | -2.472 | -1.893 | 12.356 | 1.00 | 0.00 | L0 |
| ATOM | 9  | C18 | L0 | 1 | -2.574 | -2.712 | 10.367 | 1.00 | 0.00 | L0 |
| ATOM | 10 | H17 | L0 | 1 | -3.472 | -3.291 | 10.566 | 1.00 | 0.00 | L0 |
| ATOM | 11 | C19 | L0 | 1 | -1.988 | -2.743 | 9.098  | 1.00 | 0.00 | L0 |
| ATOM | 12 | C13 | L0 | 1 | -2.544 | -3.633 | 8.020  | 1.00 | 0.00 | L0 |
| ATOM | 13 | O3  | L0 | 1 | -3.731 | -3.532 | 7.703  | 1.00 | 0.00 | L0 |
| ATOM | 14 | N2  | L0 | 1 | -1.674 | -4.469 | 7.399  | 1.00 | 0.00 | L0 |
| ATOM | 15 | C12 | L0 | 1 | -0.365 | -4.880 | 7.937  | 1.00 | 0.00 | L0 |
| ATOM | 16 | C10 | L0 | 1 | 0.731  | -4.366 | 6.979  | 1.00 | 0.00 | L0 |
| ATOM | 17 | H7  | L0 | 1 | 1.708  | -4.743 | 7.291  | 1.00 | 0.00 | L0 |
| ATOM | 18 | H8  | L0 | 1 | 0.749  | -3.273 | 6.982  | 1.00 | 0.00 | L0 |
| ATOM | 19 | H11 | L0 | 1 | -0.323 | -5.970 | 8.006  | 1.00 | 0.00 | L0 |
| ATOM | 20 | H12 | L0 | 1 | -0.227 | -4.450 | 8.932  | 1.00 | 0.00 | L0 |
| ATOM | 21 | C11 | L0 | 1 | -1.963 | -5.048 | 6.085  | 1.00 | 0.00 | L0 |
| ATOM | 22 | H9  | L0 | 1 | -2.973 | -4.776 | 5.769  | 1.00 | 0.00 | L0 |
| ATOM | 23 | H10 | L0 | 1 | -1.879 | -6.137 | 6.127  | 1.00 | 0.00 | L0 |
| ATOM | 24 | C9  | L0 | 1 | -0.913 | -4.458 | 5.120  | 1.00 | 0.00 | L0 |
| ATOM | 25 | H6  | L0 | 1 | -0.991 | -3.368 | 5.098  | 1.00 | 0.00 | L0 |
| ATOM | 26 | H18 | L0 | 1 | -1.064 | -4.851 | 4.111  | 1.00 | 0.00 | L0 |
| ATOM | 27 | N1  | L0 | 1 | 0.426  | -4.852 | 5.613  | 1.00 | 0.00 | L0 |
| ATOM | 28 | C8  | L0 | 1 | 1.247  | -5.580 | 4.803  | 1.00 | 0.00 | L0 |
| ATOM | 29 | O2  | L0 | 1 | 0.944  | -5.989 | 3.681  | 1.00 | 0.00 | L0 |
| ATOM | 30 | C7  | L0 | 1 | 2.698  | -5.909 | 5.345  | 1.00 | 0.00 | L0 |
| ATOM | 31 | O1  | L0 | 1 | 3.024  | -7.096 | 5.366  | 1.00 | 0.00 | L0 |
| ATOM | 32 | C1  | L0 | 1 | 3.606  | -4.868 | 5.848  | 1.00 | 0.00 | L0 |
| ATOM | 33 | C   | L0 | 1 | 4.642  | -5.169 | 6.712  | 1.00 | 0.00 | L0 |
| ATOM | 34 | H   | L0 | 1 | 4.919  | -6.123 | 7.144  | 1.00 | 0.00 | L0 |
| ATOM | 35 | N   | L0 | 1 | 5.365  | -4.056 | 7.010  | 1.00 | 0.00 | L0 |
| ATOM | 36 | H1  | L0 | 1 | 6.163  | -4.013 | 7.629  | 1.00 | 0.00 | L0 |
| ATOM | 37 | C3  | L0 | 1 | 4.849  | -2.974 | 6.339  | 1.00 | 0.00 | L0 |
| ATOM | 38 | C2  | L0 | 1 | 3.709  | -3.436 | 5.590  | 1.00 | 0.00 | L0 |
| ATOM | 39 | C5  | L0 | 1 | 3.022  | -2.465 | 4.818  | 1.00 | 0.00 | L0 |
| ATOM | 40 | O   | L0 | 1 | 1.977  | -2.899 | 4.034  | 1.00 | 0.00 | L0 |
| ATOM | 41 | C6  | L0 | 1 | 0.961  | -1.974 | 3.660  | 1.00 | 0.00 | L0 |
| ATOM | 42 | H3  | L0 | 1 | 0.222  | -2.492 | 3.044  | 1.00 | 0.00 | L0 |
| ATOM | 43 | H4  | L0 | 1 | 1.409  | -1.156 | 3.091  | 1.00 | 0.00 | L0 |
| ATOM | 44 | H5  | L0 | 1 | 0.483  | -1.579 | 4.560  | 1.00 | 0.00 | L0 |
| ATOM | 45 | C4  | L0 | 1 | 3.483  | -1.144 | 4.862  | 1.00 | 0.00 | L0 |
| ATOM | 46 | H2  | L0 | 1 | 2.974  | -0.366 | 4.297  | 1.00 | 0.00 | L0 |
| ATOM | 47 | N3  | L0 | 1 | 4.553  | -0.729 | 5.576  | 1.00 | 0.00 | L0 |
| ATOM | 48 | C20 | L0 | 1 | 5.264  | -1.632 | 6.296  | 1.00 | 0.00 | L0 |
| ATOM | 49 | N5  | L0 | 1 | 6.436  | -1.172 | 6.949  | 1.00 | 0.00 | L0 |
| ATOM | 50 | N4  | L0 | 1 | 7.427  | -1.996 | 7.320  | 1.00 | 0.00 | L0 |
| ATOM | 51 | C21 | L0 | 1 | 8.327  | -1.174 | 7.811  | 1.00 | 0.00 | L0 |
| ATOM | 52 | C23 | L0 | 1 | 9.651  | -1.681 | 8.331  | 1.00 | 0.00 | L0 |
| ATOM | 53 | H20 | L0 | 1 | 10.127 | -2.341 | 7.603  | 1.00 | 0.00 | L0 |
| ATOM | 54 | H21 | L0 | 1 | 9.501  | -2.243 | 9.255  | 1.00 | 0.00 | L0 |
| ATOM | 55 | H22 | L0 | 1 | 10.324 | -0.843 | 8.523  | 1.00 | 0.00 | L0 |
| ATOM | 56 | N6  | L0 | 1 | 8.011  | 0.111  | 7.816  | 1.00 | 0.00 | L0 |
| ATOM | 57 | C22 | L0 | 1 | 6.825  | 0.104  | 7.265  | 1.00 | 0.00 | L0 |
| ATOM | 58 | H19 | L0 | 1 | 6.209  | 0.968  | 7.071  | 1.00 | 0.00 | L0 |
| END  |    |     |    |   |        |        |        |      |      |    |

\* AMBER ! Force Field for organic molecules

\* Wang J, Wolf RM, Caldwell JW, Kollman PA, Case DA. Development and testing of a general amber force field. J Comput Chem 2004;25:1157-1174.

\* Converted into CHARMM format

\* David R. Langley, Feb. 3, 2006

\*

22 0

AUTOGENERATE ANGLES DIHE  
DEFA FIRS NONE LAST NONE

```
RESI LO      0.00
GROUP
ATOM  C14    gca   -0.10772
ATOM  H13    gha    0.13831
ATOM  C15    gca   -0.13266
ATOM  H14    gha    0.13743
ATOM  C16    gca   -0.11489
ATOM  H15    gha    0.13587
ATOM  C17    gca   -0.13256
ATOM  H16    gha    0.13793
ATOM  C18    gca   -0.09041
ATOM  H17    gha    0.14654
ATOM  C19    gca   -0.12969
ATOM  C13    gc     0.67013
ATOM  O3     go    -0.59347
ATOM  N2     gn    -0.46277
ATOM  C12    gc3    0.06199
ATOM  C10    gc3    0.05916
ATOM  H7     gh1    0.08972
ATOM  H8     gh1    0.05167
ATOM  H11    gh1    0.06040
ATOM  H12    gh1    0.07036
ATOM  C11    gc3    0.05818
ATOM  H9     gh1    0.05548
ATOM  H10    gh1    0.09426
ATOM  C9     gc3    0.06105
ATOM  H6     gh1    0.06441
ATOM  H18    gh1    0.06219
ATOM  N1     gn    -0.44118
ATOM  C8     gc     0.59924
ATOM  O2     go    -0.57646
ATOM  C7     gc     0.55521
ATOM  O1     go    -0.51376
ATOM  C1     gcd    -0.24350
ATOM  C      gcc    -0.01573
ATOM  H      gh4    0.19607
ATOM  N      gna    -0.13879
ATOM  H1     ghn    0.33719
ATOM  C3     gca   -0.14933
ATOM  C2     gca   -0.03382
ATOM  C5     gca    0.03810
ATOM  O      gos   -0.31899
ATOM  C6     gc3    0.11206
ATOM  H3     gh1    0.08701
ATOM  H4     gh1    0.04505
ATOM  H5     gh1    0.02774
ATOM  C4     gca    0.33916
ATOM  H2     gh4    0.03706
ATOM  N3     gnb   -0.66193
ATOM  C20    gca    0.50358
ATOM  N5     gna   -0.09800
ATOM  N4     gnd   -0.56355
ATOM  C21    gcc    0.54846
ATOM  C23    gc3   -0.11818
ATOM  H20    ghc    0.07155
ATOM  H21    ghc    0.05781
ATOM  H22    ghc    0.05808
ATOM  N6     gnc   -0.68766
ATOM  C22    gcd    0.46264
ATOM  H19    gh5    0.09396
BOND  C      H
```

|      |     |     |     |     |
|------|-----|-----|-----|-----|
| BOND | C   | N   |     |     |
| BOND | C   | C1  |     |     |
| BOND | N   | H1  |     |     |
| BOND | N   | C3  |     |     |
| BOND | C1  | C2  |     |     |
| BOND | C1  | C7  |     |     |
| BOND | C2  | C3  |     |     |
| BOND | C2  | C5  |     |     |
| BOND | C3  | C20 |     |     |
| BOND | C4  | H2  |     |     |
| BOND | C4  | C5  |     |     |
| BOND | C4  | N3  |     |     |
| BOND | C5  | O   |     |     |
| BOND | O   | C6  |     |     |
| BOND | C6  | H3  |     |     |
| BOND | C6  | H4  |     |     |
| BOND | C6  | H5  |     |     |
| BOND | C7  | O1  |     |     |
| BOND | C7  | C8  |     |     |
| BOND | C8  | O2  |     |     |
| BOND | C8  | N1  |     |     |
| BOND | N1  | C9  |     |     |
| BOND | N1  | C10 |     |     |
| BOND | C9  | H6  |     |     |
| BOND | C9  | C11 |     |     |
| BOND | C9  | H18 |     |     |
| BOND | C10 | H7  |     |     |
| BOND | C10 | H8  |     |     |
| BOND | C10 | C12 |     |     |
| BOND | C11 | H9  |     |     |
| BOND | C11 | H10 |     |     |
| BOND | C11 | N2  |     |     |
| BOND | C12 | H11 |     |     |
| BOND | C12 | H12 |     |     |
| BOND | C12 | N2  |     |     |
| BOND | N2  | C13 |     |     |
| BOND | C13 | O3  |     |     |
| BOND | C13 | C19 |     |     |
| BOND | C14 | H13 |     |     |
| BOND | C14 | C15 |     |     |
| BOND | C14 | C19 |     |     |
| BOND | C15 | H14 |     |     |
| BOND | C15 | C16 |     |     |
| BOND | C16 | H15 |     |     |
| BOND | C16 | C17 |     |     |
| BOND | C17 | H16 |     |     |
| BOND | C17 | C18 |     |     |
| BOND | C18 | H17 |     |     |
| BOND | C18 | C19 |     |     |
| BOND | N3  | C20 |     |     |
| BOND | C20 | N5  |     |     |
| BOND | C21 | N4  |     |     |
| BOND | C21 | N6  |     |     |
| BOND | C21 | C23 |     |     |
| BOND | N4  | N5  |     |     |
| BOND | C22 | H19 |     |     |
| BOND | C22 | N5  |     |     |
| BOND | C22 | N6  |     |     |
| BOND | C23 | H20 |     |     |
| BOND | C23 | H21 |     |     |
| BOND | C23 | H22 |     |     |
| IMPH | C19 | C15 | C14 | H13 |
| IMPH | C14 | C16 | C15 | H14 |
| IMPH | C15 | C17 | C16 | H15 |
| IMPH | C18 | C16 | C17 | H16 |
| IMPH | C19 | C17 | C18 | H17 |
| IMPH | C13 | C18 | C19 | C14 |
| IMPH | C19 | N2  | C13 | O3  |

```

IMPH  C7      N1      C8      O2
IMPH  C8      C1      C7      O1
IMPH  C7      C2      C1      C
IMPH  C1      H       C       N
IMPH  C3      C       N       H1
IMPH  C2      C20     C3      N
IMPH  C3      C5      C2      C1
IMPH  C2      C4      C5      O
IMPH  C5      H2      C4      N3
IMPH  C3      N5      C20     N3
IMPH  C20     C22     N5      N4
IMPH  C23     N6      C21     N4
IMPH  H19     N5      C22     N6
IMPH   C8      C9      N1      C10 !DRL
IMPH  C13     C11     N2      C12 !DRL
END

```

```

* AMBER ! Force Field for organic molecules
* Wang J, Wolf RM, Caldwell JW, Kollman PA, Case DA. Development and testing * of a
general amber force field. J Comput Chem 2004;25:1157-1174.
* Converted into CHARMM format
* David R. Langley, Feb. 3, 2006
*

```

BOND

```

gc gc 290.1 1.550
gc gn 478.2 1.345
gc go 648.0 1.214
gc gc3 328.3 1.508
gc gca 349.7 1.487
gc gcc 377.4 1.462
gc gcd 377.4 1.462
gc gha 325.1 1.101
gc gnc 438.8 1.371
gc gnd 438.8 1.371
gc gos 411.3 1.343
gn gn 469.7 1.390
gn go 646.6 1.264
gn gna 486.8 1.379
gn gnc 532.1 1.352
gn gnd 532.1 1.352
gn gos 372.3 1.429
go go 384.3 1.430
go gos 306.3 1.504
gc3 gn 330.6 1.460
gc3 go 422.6 1.335
gc3 gc3 303.1 1.535
gc3 gca 323.5 1.513
gc3 gcc 337.3 1.499
gc3 gcd 337.3 1.499
gc3 gh1 335.9 1.093
gc3 ghc 337.3 1.092
gc3 gna 334.7 1.456
gc3 gnc 334.7 1.456
gc3 gnd 334.7 1.456
gc3 gos 301.5 1.439
gca gn 372.3 1.422
gca go 519.7 1.275
gca gca 478.4 1.387
gca gcc 411.7 1.434
gca gcd 411.7 1.434
gca gh4 342.9 1.088
gca gh5 347.2 1.085
gca gha 344.3 1.087
gca gna 470.3 1.350
gca gnb 483.1 1.342
gca gnc 492.9 1.336
gca gnd 492.9 1.336

```

|     |     |       |       |
|-----|-----|-------|-------|
| gca | gos | 372.4 | 1.373 |
| gcc | gn  | 426.0 | 1.380 |
| gcc | gcc | 418.3 | 1.429 |
| gcc | gcd | 504.0 | 1.371 |
| gcc | gh4 | 350.1 | 1.083 |
| gcc | gh5 | 356.0 | 1.079 |
| gcc | gha | 347.2 | 1.085 |
| gcc | gna | 438.8 | 1.371 |
| gcc | gnc | 431.6 | 1.376 |
| gcc | gnd | 494.6 | 1.335 |
| gcc | gos | 376.1 | 1.370 |
| gcd | gn  | 426.0 | 1.380 |
| gcd | gcd | 418.3 | 1.429 |
| gcd | gh4 | 350.1 | 1.083 |
| gcd | gh5 | 356.0 | 1.079 |
| gcd | gha | 347.2 | 1.085 |
| gcd | gna | 438.8 | 1.371 |
| gcd | gnc | 494.6 | 1.335 |
| gcd | gnd | 431.6 | 1.376 |
| gcd | gos | 376.1 | 1.370 |
| ghn | gn  | 410.2 | 1.009 |
| ghn | gna | 406.6 | 1.011 |
| gna | go  | 644.3 | 1.265 |
| gna | gna | 453.3 | 1.401 |
| gna | gnc | 535.7 | 1.350 |
| gna | gnd | 535.7 | 1.350 |
| gna | gos | 355.2 | 1.444 |
| gnb | gnb | 550.2 | 1.342 |
| gnc | gnc | 486.8 | 1.379 |
| gnc | gnd | 602.9 | 1.315 |
| gnc | gos | 414.9 | 1.395 |
| gnd | gnd | 486.8 | 1.379 |
| gnd | gos | 414.9 | 1.395 |
| gos | gos | 343.6 | 1.466 |

#### ANGLE

|    |     |     |        |         |
|----|-----|-----|--------|---------|
| gc | gc  | gc  | 62.300 | 111.680 |
| gc | gc  | gn  | 69.900 | 104.810 |
| gc | gc  | go  | 66.800 | 122.340 |
| gc | gc  | gc3 | 61.700 | 116.860 |
| gc | gc  | gcc | 64.000 | 111.670 |
| gc | gc  | gcd | 64.000 | 111.670 |
| gc | gc  | gha | 44.800 | 115.430 |
| gc | gc  | ghc | 44.600 | 117.080 |
| gc | gn  | gc  | 67.400 | 119.630 |
| gc | gn  | gn  | 68.200 | 118.420 |
| gc | gn  | go  | 71.600 | 118.900 |
| gc | gn  | gc3 | 63.900 | 121.350 |
| gc | gn  | gca | 64.300 | 123.710 |
| gc | gn  | gcc | 65.200 | 124.190 |
| gc | gn  | gcd | 65.200 | 124.190 |
| gc | gn  | ghn | 49.200 | 118.460 |
| gc | gn  | gna | 68.200 | 119.200 |
| gc | gn  | gnc | 68.600 | 120.310 |
| gc | gn  | gnd | 68.600 | 120.310 |
| gc | gn  | gos | 69.100 | 113.140 |
| gc | gc3 | gc  | 63.700 | 112.950 |
| gc | gc3 | gn  | 66.700 | 111.560 |
| gc | gc3 | gc3 | 63.800 | 110.530 |
| gc | gc3 | gca | 64.100 | 111.230 |
| gc | gc3 | gh1 | 47.600 | 107.660 |
| gc | gc3 | ghc | 47.200 | 109.680 |
| gc | gc3 | gna | 68.600 | 105.720 |
| gc | gc3 | gos | 68.000 | 109.820 |
| gc | gca | gc  | 62.700 | 120.000 |
| gc | gca | gc3 | 62.600 | 118.060 |
| gc | gca | gca | 64.600 | 120.140 |
| gc | gca | gha | 46.500 | 115.900 |



|     |     |     |        |         |
|-----|-----|-----|--------|---------|
| gc  | gca | ghc | 11.200 | 120.000 |
| gc  | gca | gnc | 64.400 | 130.800 |
| gc  | gca | gnd | 64.400 | 130.800 |
| gc  | gcc | gc3 | 64.900 | 112.750 |
| gc  | gcc | gca | 63.600 | 122.950 |
| gc  | gcc | gcc | 63.700 | 122.690 |
| gc  | gcc | gcd | 65.700 | 119.920 |
| gc  | gcc | gha | 47.000 | 117.020 |
| gc  | gcc | gnc | 64.300 | 130.800 |
| gc  | gcc | gnd | 70.100 | 112.910 |
| gc  | gcd | gn  | 68.200 | 116.060 |
| gc  | gcd | gc3 | 64.900 | 112.750 |
| gc  | gcd | gca | 63.600 | 122.950 |
| gc  | gcd | gcc | 65.700 | 119.920 |
| gc  | gcd | gcd | 63.700 | 122.690 |
| gc  | gcd | gha | 47.000 | 117.020 |
| gc  | gcd | gnc | 70.100 | 112.910 |
| gc  | gcd | gnd | 64.300 | 130.800 |
| gc  | gna | gc  | 64.700 | 126.400 |
| gc  | gna | gn  | 66.300 | 124.660 |
| gc  | gna | gc3 | 64.700 | 117.600 |
| gc  | gna | gca | 65.300 | 125.200 |
| gc  | gna | ghn | 48.800 | 118.000 |
| gc  | gnc | gca | 66.600 | 120.660 |
| gc  | gnc | gcd | 67.000 | 119.250 |
| gc  | gnd | gca | 66.600 | 120.660 |
| gc  | gnd | gcc | 67.000 | 119.250 |
| gc  | gos | gc  | 64.000 | 122.650 |
| gc  | gos | gc3 | 63.600 | 115.140 |
| gc  | gos | gca | 64.600 | 117.610 |
| gc  | gos | gcc | 64.200 | 119.620 |
| gc  | gos | gcd | 64.200 | 119.620 |
| gn  | gc  | gn  | 75.400 | 111.700 |
| gn  | gc  | go  | 75.800 | 122.030 |
| gn  | gc  | gnc | 73.000 | 116.840 |
| gn  | gc  | gnd | 73.000 | 116.840 |
| gn  | gc  | gos | 74.700 | 115.250 |
| gn  | gn  | gn  | 69.900 | 114.620 |
| gn  | gc3 | gn  | 68.800 | 113.810 |
| gn  | gca | gnc | 69.700 | 123.860 |
| gn  | gca | gnd | 69.700 | 123.860 |
| gn  | gcc | gc  | 68.200 | 116.060 |
| gn  | gcc | gnd | 70.900 | 123.860 |
| gn  | gcd | gnc | 70.900 | 123.860 |
| gn  | gna | gn  | 67.800 | 123.800 |
| gn  | gna | gnc | 69.600 | 119.850 |
| gn  | gna | gnd | 69.600 | 119.850 |
| gn  | gna | gos | 72.300 | 104.710 |
| gn  | gos | gn  | 67.200 | 108.310 |
| go  | gc  | go  | 79.100 | 127.330 |
| go  | gc  | gos | 76.200 | 122.430 |
| go  | gn  | go  | 73.400 | 128.610 |
| go  | gc3 | go  | 73.400 | 122.300 |
| go  | gca | go  | 75.500 | 126.820 |
| go  | gna | go  | 74.000 | 126.200 |
| go  | gna | gos | 70.800 | 118.390 |
| go  | gos | go  | 62.800 | 114.680 |
| gc3 | gc  | gn  | 67.900 | 115.150 |
| gc3 | gc  | go  | 68.000 | 123.110 |
| gc3 | gc  | gc3 | 62.800 | 116.050 |
| gc3 | gc  | gca | 62.300 | 119.530 |
| gc3 | gc  | gcc | 67.200 | 104.510 |
| gc3 | gc  | gcd | 67.200 | 104.510 |
| gc3 | gc  | gha | 46.000 | 115.220 |
| gc3 | gc  | gos | 69.300 | 111.960 |
| gc3 | gn  | gc3 | 64.000 | 112.620 |
| gc3 | gn  | gca | 62.400 | 121.150 |
| gc3 | gn  | gcc | 63.300 | 121.170 |

|     |     |     |        |         |
|-----|-----|-----|--------|---------|
| gc3 | gn  | gcd | 63.300 | 121.170 |
| gc3 | gn  | ghn | 46.000 | 116.780 |
| gc3 | gc3 | gn  | 65.900 | 112.130 |
| gc3 | gc3 | gc3 | 63.200 | 110.630 |
| gc3 | gc3 | gca | 62.500 | 114.610 |
| gc3 | gc3 | gcc | 64.700 | 108.100 |
| gc3 | gc3 | gcd | 64.700 | 108.100 |
| gc3 | gc3 | gh1 | 46.400 | 110.070 |
| gc3 | gc3 | ghc | 46.400 | 110.050 |
| gc3 | gc3 | gna | 65.800 | 112.590 |
| gc3 | gc3 | gos | 67.800 | 108.420 |
| gc3 | gca | gc3 | 62.400 | 116.800 |
| gc3 | gca | gca | 63.800 | 120.630 |
| gc3 | gcc | gca | 64.100 | 117.810 |
| gc3 | gcc | gcc | 64.700 | 115.970 |
| gc3 | gcc | gcd | 64.800 | 119.450 |
| gc3 | gcc | gha | 45.100 | 121.520 |
| gc3 | gcc | gna | 65.500 | 122.800 |
| gc3 | gcc | gnc | 65.800 | 121.440 |
| gc3 | gcc | gnd | 66.400 | 121.960 |
| gc3 | gcc | gos | 67.800 | 115.890 |
| gc3 | gcd | gca | 64.100 | 117.810 |
| gc3 | gcd | gcc | 64.800 | 119.450 |
| gc3 | gcd | gcd | 64.700 | 115.970 |
| gc3 | gcd | gha | 45.100 | 121.520 |
| gc3 | gcd | gna | 65.500 | 122.800 |
| gc3 | gcd | gnc | 66.400 | 121.960 |
| gc3 | gcd | gnd | 65.800 | 121.440 |
| gc3 | gcd | gos | 67.800 | 115.890 |
| gc3 | gna | gc3 | 60.700 | 125.590 |
| gc3 | gna | gca | 63.100 | 124.360 |
| gc3 | gna | gcc | 62.600 | 125.090 |
| gc3 | gna | gcd | 62.600 | 125.090 |
| gc3 | gna | gnc | 65.700 | 120.460 |
| gc3 | gna | gnd | 65.700 | 120.460 |
| gc3 | gna | gos | 68.900 | 104.390 |
| gc3 | gnc | gcd | 67.600 | 109.510 |
| gc3 | gnd | gcc | 67.600 | 109.510 |
| gc3 | gos | gn  | 65.300 | 108.570 |
| gc3 | gos | go  | 65.600 | 103.000 |
| gc3 | gos | gc3 | 62.100 | 113.410 |
| gc3 | gos | gca | 62.400 | 117.600 |
| gc3 | gos | gcc | 63.100 | 115.180 |
| gc3 | gos | gcd | 63.100 | 115.180 |
| gc3 | gos | gna | 64.500 | 109.910 |
| gc3 | gos | gnc | 64.800 | 112.730 |
| gc3 | gos | gnd | 64.800 | 112.730 |
| gc3 | gos | gos | 65.900 | 105.010 |
| gca | gc  | gn  | 69.400 | 112.030 |
| gca | gc  | go  | 68.700 | 123.440 |
| gca | gc  | gca | 62.800 | 119.530 |
| gca | gc  | gcc | 64.800 | 114.090 |
| gca | gc  | gcd | 64.800 | 114.090 |
| gca | gc  | gha | 46.800 | 114.120 |
| gca | gc  | gos | 68.800 | 115.540 |
| gca | gn  | gca | 64.500 | 116.800 |
| gca | gn  | gcc | 65.000 | 118.420 |
| gca | gn  | gcd | 65.000 | 118.420 |
| gca | gn  | ghn | 47.600 | 114.590 |
| gca | gn  | gna | 66.800 | 117.570 |
| gca | gn  | gnc | 68.800 | 113.030 |
| gca | gn  | gnd | 68.800 | 113.030 |
| gca | gc3 | gca | 63.600 | 112.470 |
| gca | gc3 | gcc | 65.200 | 108.080 |
| gca | gc3 | gcd | 65.200 | 108.080 |
| gca | gc3 | gh1 | 46.800 | 110.950 |
| gca | gc3 | ghc | 47.000 | 110.150 |
| gca | gc3 | gnc | 68.200 | 106.510 |

|             |        |         |
|-------------|--------|---------|
| gca gc3 gnd | 68.200 | 106.510 |
| gca gc3 gos | 67.700 | 110.510 |
| gca gca gn  | 68.000 | 119.890 |
| gca gca go  | 70.900 | 123.430 |
| gca gca gca | 67.200 | 119.970 |
| gca gca gcc | 66.000 | 120.100 |
| gca gca gcd | 66.000 | 120.100 |
| gca gca gh4 | 48.200 | 121.090 |
| gca gca gha | 48.500 | 120.010 |
| gca gca gna | 70.200 | 118.340 |
| gca gca gnb | 69.200 | 122.630 |
| gca gca gnc | 70.100 | 119.720 |
| gca gca gnd | 70.100 | 119.720 |
| gca gca gos | 69.800 | 119.200 |
| gca gcc gn  | 72.500 | 104.870 |
| gca gcc gcc | 67.700 | 111.040 |
| gca gcc gcd | 68.200 | 113.510 |
| gca gcc gh4 | 45.600 | 128.660 |
| gca gcc gha | 46.400 | 124.040 |
| gca gcc gnd | 70.200 | 115.050 |
| gca gcc gos | 69.500 | 116.240 |
| gca gcd gn  | 72.500 | 104.870 |
| gca gcd gcc | 68.200 | 113.510 |
| gca gcd gcd | 67.700 | 111.040 |
| gca gcd gh4 | 45.600 | 128.660 |
| gca gcd gha | 46.400 | 124.040 |
| gca gcd gnc | 70.200 | 115.050 |
| gca gcd gos | 69.500 | 116.240 |
| gca gna gn  | 67.300 | 122.000 |
| gca gna go  | 70.900 | 120.680 |
| gca gna gca | 67.100 | 119.800 |
| gca gna gcc | 68.500 | 113.150 |
| gca gna gcd | 68.500 | 113.150 |
| gca gna ghn | 48.200 | 122.770 |
| gca gna gna | 66.300 | 123.760 |
| gca gna gnc | 69.300 | 117.850 |
| gca gna gnd | 69.300 | 117.850 |
| gca gna gos | 69.700 | 109.460 |
| gca gnb gca | 68.600 | 115.860 |
| gca gnb gnb | 69.400 | 118.890 |
| gca gnc gn  | 73.800 | 104.690 |
| gca gnc gca | 70.700 | 109.950 |
| gca gnc gcd | 71.100 | 108.820 |
| gca gnc gna | 74.100 | 104.160 |
| gca gnc gos | 73.100 | 104.340 |
| gca gnd gn  | 73.800 | 104.690 |
| gca gnd gca | 70.700 | 109.950 |
| gca gnd gcc | 71.100 | 108.820 |
| gca gnd gna | 74.100 | 104.160 |
| gca gnd gos | 73.100 | 104.340 |
| gca gos gca | 63.600 | 118.960 |
| gca gos gcc | 66.200 | 109.770 |
| gca gos gcd | 66.200 | 109.770 |
| gca gos gna | 66.500 | 108.240 |
| gca gos gnc | 66.100 | 113.680 |
| gca gos gnd | 66.100 | 113.680 |
| gcc gc gn   | 70.200 | 111.860 |
| gcc gc go   | 68.900 | 125.710 |
| gcc gc gcc  | 65.300 | 114.450 |
| gcc gc gcd  | 65.700 | 112.790 |
| gcc gc gos  | 70.500 | 112.300 |
| gcc gn gn   | 66.500 | 121.370 |
| gcc gn go   | 70.100 | 120.540 |
| gcc gn gcc  | 68.800 | 108.920 |
| gcc gn ghn  | 47.500 | 121.520 |
| gcc gn gna  | 67.900 | 117.570 |
| gcc gn gnc  | 69.900 | 113.030 |
| gcc gn gos  | 67.600 | 115.560 |

|     |     |     |        |         |
|-----|-----|-----|--------|---------|
| gcc | gc3 | gcc | 65.500 | 107.990 |
| gcc | gc3 | gcd | 67.300 | 102.350 |
| gcc | gc3 | gh1 | 47.000 | 111.620 |
| gcc | gc3 | ghc | 47.200 | 110.860 |
| gcc | gc3 | gnc | 68.400 | 107.040 |
| gcc | gc3 | gos | 67.800 | 111.280 |
| gcc | gca | gnb | 66.900 | 126.210 |
| gcc | gcc | gn  | 67.900 | 119.890 |
| gcc | gcc | gcc | 67.900 | 110.700 |
| gcc | gcc | gcd | 68.200 | 114.190 |
| gcc | gcc | gh4 | 45.600 | 129.470 |
| gcc | gcc | gha | 46.600 | 123.740 |
| gcc | gcc | gna | 72.200 | 106.800 |
| gcc | gcc | gnc | 70.000 | 113.420 |
| gcc | gcc | gnd | 71.100 | 112.560 |
| gcc | gcc | gos | 68.400 | 120.430 |
| gcc | gcd | gn  | 70.700 | 115.520 |
| gcc | gcd | gcc | 69.300 | 115.510 |
| gcc | gcd | gcd | 68.200 | 114.190 |
| gcc | gcd | gh4 | 47.200 | 129.110 |
| gcc | gcd | gha | 48.400 | 122.890 |
| gcc | gcd | gna | 72.900 | 109.420 |
| gcc | gcd | gnd | 71.000 | 114.980 |
| gcc | gcd | gos | 70.000 | 120.300 |
| gcc | gna | gn  | 66.500 | 123.190 |
| gcc | gna | go  | 69.000 | 125.210 |
| gcc | gna | gcc | 68.900 | 109.900 |
| gcc | gna | gcd | 63.900 | 128.010 |
| gcc | gna | ghn | 47.200 | 124.660 |
| gcc | gna | gna | 65.900 | 123.430 |
| gcc | gna | gnc | 70.200 | 113.020 |
| gcc | gna | gos | 67.300 | 115.740 |
| gcc | gnc | gcc | 68.600 | 110.190 |
| gcc | gnc | gcd | 70.500 | 107.470 |
| gcc | gnc | gna | 73.400 | 102.970 |
| gcc | gnc | gnd | 72.500 | 107.940 |
| gcc | gnd | gn  | 74.000 | 104.150 |
| gcc | gnd | gcd | 70.500 | 107.470 |
| gcc | gnd | gna | 74.200 | 103.730 |
| gcc | gnd | gnd | 71.400 | 109.510 |
| gcc | gnd | gos | 72.200 | 106.990 |
| gcc | gos | gcc | 66.500 | 109.170 |
| gcc | gos | gcd | 62.700 | 122.990 |
| gcc | gos | gna | 65.500 | 111.660 |
| gcc | gos | gnc | 68.100 | 107.230 |
| gcc | gos | gos | 66.300 | 108.470 |
| gcd | gc  | gn  | 70.200 | 111.860 |
| gcd | gc  | go  | 68.900 | 125.710 |
| gcd | gc  | gcd | 65.300 | 114.450 |
| gcd | gc  | gos | 70.500 | 112.300 |
| gcd | gn  | gn  | 66.500 | 121.370 |
| gcd | gn  | go  | 70.100 | 120.540 |
| gcd | gn  | gcd | 68.800 | 108.920 |
| gcd | gn  | ghn | 47.500 | 121.520 |
| gcd | gn  | gna | 67.900 | 117.570 |
| gcd | gn  | gnd | 69.900 | 113.030 |
| gcd | gn  | gos | 67.600 | 115.560 |
| gcd | gc3 | gcd | 65.500 | 107.990 |
| gcd | gc3 | gh1 | 47.000 | 111.620 |
| gcd | gc3 | ghc | 47.200 | 110.860 |
| gcd | gc3 | gnd | 68.400 | 107.040 |
| gcd | gc3 | gos | 67.800 | 111.280 |
| gcd | gca | gnb | 66.900 | 126.210 |
| gcd | gcc | gn  | 70.700 | 115.520 |
| gcd | gcc | gcd | 69.300 | 115.510 |
| gcd | gcc | gh4 | 47.200 | 129.110 |
| gcd | gcc | gha | 48.400 | 122.890 |
| gcd | gcc | gna | 72.900 | 109.420 |

|     |     |     |        |         |
|-----|-----|-----|--------|---------|
| gcd | gcc | gnc | 71.000 | 114.980 |
| gcd | gcc | gos | 70.000 | 120.300 |
| gcd | gcd | gn  | 67.900 | 119.890 |
| gcd | gcd | gcd | 67.900 | 110.700 |
| gcd | gcd | gh4 | 45.600 | 129.470 |
| gcd | gcd | gha | 46.600 | 123.740 |
| gcd | gcd | gna | 72.200 | 106.800 |
| gcd | gcd | gnc | 71.100 | 112.560 |
| gcd | gcd | gnd | 70.000 | 113.420 |
| gcd | gcd | gos | 68.400 | 120.430 |
| gcd | gna | gn  | 66.500 | 123.190 |
| gcd | gna | go  | 69.000 | 125.210 |
| gcd | gna | gcd | 68.900 | 109.900 |
| gcd | gna | ghn | 47.200 | 124.660 |
| gcd | gna | gna | 65.900 | 123.430 |
| gcd | gna | gnd | 70.200 | 113.020 |
| gcd | gna | gos | 67.300 | 115.740 |
| gcd | gnc | gn  | 74.000 | 104.150 |
| gcd | gnc | gna | 74.200 | 103.730 |
| gcd | gnc | gnc | 71.400 | 109.510 |
| gcd | gnc | gos | 72.200 | 106.990 |
| gcd | gnd | gcd | 68.600 | 110.190 |
| gcd | gnd | gna | 73.400 | 102.970 |
| gcd | gnd | gnc | 72.500 | 107.940 |
| gcd | gos | gcd | 66.500 | 109.170 |
| gcd | gos | gna | 65.500 | 111.660 |
| gcd | gos | gnd | 68.100 | 107.230 |
| gcd | gos | gos | 66.300 | 108.470 |
| gh1 | gc3 | gn  | 49.800 | 109.320 |
| gh1 | gc3 | go  | 52.000 | 117.190 |
| gh1 | gc3 | gh1 | 39.200 | 109.550 |
| gh1 | gc3 | gna | 49.900 | 109.450 |
| gh1 | gc3 | gnc | 50.100 | 108.570 |
| gh1 | gc3 | gnd | 50.100 | 108.570 |
| gh1 | gc3 | gos | 50.800 | 108.820 |
| gh4 | gca | gn  | 49.500 | 116.020 |
| gh4 | gca | gna | 51.900 | 114.650 |
| gh4 | gca | gnb | 51.800 | 115.940 |
| gh4 | gca | gnc | 51.500 | 118.360 |
| gh4 | gca | gnd | 51.500 | 118.360 |
| gh4 | gca | gos | 52.300 | 111.150 |
| gh4 | gcc | gn  | 50.400 | 117.620 |
| gh4 | gcc | gna | 50.200 | 119.660 |
| gh4 | gcc | gnc | 50.000 | 120.030 |
| gh4 | gcc | gnd | 51.400 | 119.110 |
| gh4 | gcc | gos | 52.300 | 111.890 |
| gh4 | gcd | gn  | 50.400 | 117.620 |
| gh4 | gcd | gna | 50.200 | 119.660 |
| gh4 | gcd | gnc | 51.400 | 119.110 |
| gh4 | gcd | gnd | 50.000 | 120.030 |
| gh4 | gcd | gos | 52.300 | 111.890 |
| gh5 | gca | gnb | 51.800 | 116.350 |
| gh5 | gca | gnc | 50.700 | 122.110 |
| gh5 | gca | gnd | 50.700 | 122.110 |
| gh5 | gcc | gna | 49.800 | 122.100 |
| gh5 | gcc | gnc | 49.300 | 123.700 |
| gh5 | gcc | gnd | 50.100 | 125.380 |
| gh5 | gcc | gos | 51.300 | 116.330 |
| gh5 | gcd | gna | 49.800 | 122.100 |
| gh5 | gcd | gnc | 50.100 | 125.380 |
| gh5 | gcd | gnd | 49.300 | 123.700 |
| gh5 | gcd | gos | 51.300 | 116.330 |
| gha | gc  | gn  | 52.400 | 112.370 |
| gha | gc  | go  | 54.300 | 121.940 |
| gha | gc  | gha | 37.900 | 115.610 |
| gha | gc  | gos | 53.200 | 110.340 |
| gha | gcc | gna | 49.800 | 121.500 |
| gha | gcc | gnc | 50.700 | 116.540 |

|             |        |         |
|-------------|--------|---------|
| gha gcc gnd | 51.400 | 118.880 |
| gha gcc gos | 52.500 | 110.860 |
| gha gcd gna | 49.800 | 121.500 |
| gha gcd gnc | 51.400 | 118.880 |
| gha gcd gnd | 50.700 | 116.540 |
| gha gcd gos | 52.500 | 110.860 |
| ghc gc gn   | 51.100 | 120.000 |
| ghc gc go   | 55.400 | 120.000 |
| ghc gc ghc  | 39.300 | 115.680 |
| ghc gc gos  | 52.900 | 113.580 |
| ghc gc3 gn  | 49.800 | 109.500 |
| ghc gc3 ghc | 39.400 | 108.350 |
| ghc gc3 gna | 49.900 | 109.500 |
| ghc gc3 gos | 50.900 | 108.700 |
| ghn gn gn   | 50.100 | 113.120 |
| ghn gn go   | 53.800 | 116.320 |
| ghn gn ghn  | 39.700 | 117.850 |
| ghn gn gna  | 50.400 | 113.550 |
| ghn gn gos  | 50.100 | 108.900 |
| ghn gna ghn | 39.800 | 116.800 |
| ghn gna gnc | 50.000 | 119.610 |
| ghn gna gnd | 50.000 | 119.610 |
| ghn gna gos | 51.400 | 101.410 |
| gna gc go   | 75.000 | 122.850 |
| gna gc gna  | 73.200 | 115.400 |
| gna gn gna  | 69.600 | 117.380 |
| gna gc3 gna | 69.100 | 113.490 |
| gna gc3 gos | 71.200 | 109.190 |
| gna gca gna | 74.500 | 113.320 |
| gna gca gnb | 70.200 | 128.560 |
| gna gcc gnc | 69.700 | 125.320 |
| gna gcc gnd | 74.800 | 112.020 |
| gna gcd gnc | 74.800 | 112.020 |
| gna gcd gnd | 69.700 | 125.320 |
| gna gna gna | 66.800 | 123.600 |
| gna gna gnc | 69.100 | 119.640 |
| gna gna gnd | 69.100 | 119.640 |
| gna gna gos | 70.200 | 109.470 |
| gna gnc gnd | 76.000 | 105.470 |
| gna gnd gnc | 76.000 | 105.470 |
| gna gos gna | 66.100 | 109.590 |
| gnb gca gnb | 71.200 | 125.840 |
| gnb gca gnc | 71.100 | 126.500 |
| gnb gca gnd | 71.100 | 126.500 |
| gnb gnb gnb | 70.400 | 121.040 |
| gnc gc go   | 73.900 | 125.290 |
| gnc gn gnc  | 71.300 | 116.410 |
| gnc gc3 gnc | 70.000 | 110.610 |
| gnc gc3 gos | 69.300 | 115.410 |
| gnc gca gnc | 70.700 | 128.740 |
| gnc gcc gnd | 72.500 | 118.690 |
| gnc gcd gnd | 72.500 | 118.690 |
| gnc gcd gos | 73.000 | 119.140 |
| gnc gna go  | 72.000 | 122.790 |
| gnc gna gnc | 71.200 | 117.080 |
| gnc gna gos | 68.300 | 119.650 |
| gnc gnc gnd | 73.200 | 111.150 |
| gnc gnd gnd | 73.200 | 111.150 |
| gnc gnd gos | 74.400 | 107.220 |
| gnc gos gnc | 68.200 | 110.400 |
| gnd gc go   | 73.900 | 125.290 |
| gnd gn gnd  | 71.300 | 116.410 |
| gnd gc3 gnd | 70.000 | 110.610 |
| gnd gc3 gos | 69.300 | 115.410 |
| gnd gca gnd | 70.700 | 128.740 |
| gnd gcc gos | 73.000 | 119.140 |
| gnd gna go  | 72.000 | 122.790 |
| gnd gna gnd | 71.200 | 117.080 |

|             |        |         |
|-------------|--------|---------|
| gnd gna gos | 68.300 | 119.650 |
| gnd gnc gos | 74.400 | 107.220 |
| gnd gos gnd | 68.200 | 110.400 |
| gos gc gos  | 77.800 | 107.490 |
| gos gn gos  | 71.300 | 106.530 |
| gos gc3 gos | 71.700 | 110.240 |
| gos gca gos | 74.000 | 113.730 |
| gos gna gos | 71.300 | 104.450 |

DIHE

|    |     |     |     |              |   |       |      |
|----|-----|-----|-----|--------------|---|-------|------|
| X  | gc  | gc  | X   | 0.3000000000 | 2 | 180.0 |      |
| X  | gc  | gn  | X   | 2.5000000000 | 2 | 180.0 |      |
| X  | gc  | gc3 | X   | 0.0000000000 | 2 | 180.0 |      |
| X  | gc  | gca | X   | 3.6250000000 | 2 | 180.0 |      |
| gn | gc  | gca | gca | 0.6250000000 | 2 | 180.0 | !DRL |
| go | gc  | gca | gca | 0.6250000000 | 2 | 180.0 | !DRL |
| X  | gc  | gcc | X   | 2.8750000000 | 2 | 180.0 |      |
| X  | gc  | gcd | X   | 2.8750000000 | 2 | 180.0 |      |
| X  | gc  | gna | X   | 0.3500000000 | 4 | 180.0 |      |
| X  | gc  | gna | X   | 1.4500000000 | 2 | 180.0 |      |
| X  | gc  | gnc | X   | 4.0000000000 | 2 | 180.0 |      |
| X  | gc  | gnd | X   | 4.0000000000 | 2 | 180.0 |      |
| X  | gc  | gos | X   | 2.7000000000 | 2 | 180.0 |      |
| X  | gn  | gn  | X   | 1.1500000000 | 2 | 0.0   |      |
| X  | gn  | gcc | X   | 1.6500000000 | 2 | 180.0 |      |
| X  | gn  | gcd | X   | 1.6500000000 | 2 | 180.0 |      |
| X  | gn  | gna | X   | 0.7000000000 | 2 | 0.0   |      |
| X  | gn  | gnc | X   | 4.8000000000 | 2 | 180.0 |      |
| X  | gn  | gnd | X   | 4.8000000000 | 2 | 180.0 |      |
| X  | gn  | gos | X   | 1.1000000000 | 2 | 0.0   |      |
| X  | gc3 | gn  | X   | 0.0000000000 | 2 | 0.0   |      |
| X  | gc3 | gc3 | X   | 0.1555555556 | 3 | 0.0   |      |
| X  | gc3 | gca | X   | 0.0000000000 | 2 | 0.0   |      |
| X  | gc3 | gcc | X   | 0.0000000000 | 3 | 0.0   |      |
| X  | gc3 | gcd | X   | 0.0000000000 | 3 | 0.0   |      |
| X  | gc3 | gna | X   | 0.0000000000 | 2 | 0.0   |      |
| X  | gc3 | gos | X   | 0.3833333333 | 3 | 0.0   |      |
| X  | gca | gn  | X   | 0.4500000000 | 2 | 180.0 |      |
| X  | gca | gca | X   | 3.6250000000 | 2 | 180.0 |      |
| X  | gca | gna | X   | 1.1000000000 | 2 | 180.0 | !DRL |
| X  | gca | gnb | X   | 4.8000000000 | 2 | 180.0 |      |
| X  | gca | gnc | X   | 4.8000000000 | 2 | 180.0 |      |
| X  | gca | gnd | X   | 4.8000000000 | 2 | 180.0 |      |
| X  | gca | gos | X   | 0.9000000000 | 2 | 180.0 |      |
| X  | gcc | gcc | X   | 4.0000000000 | 2 | 180.0 |      |
| X  | gcc | gcd | X   | 4.0000000000 | 2 | 180.0 |      |
| X  | gcc | gna | X   | 1.7000000000 | 2 | 180.0 |      |
| X  | gcc | gnc | X   | 4.7500000000 | 2 | 180.0 |      |
| X  | gcc | gnd | X   | 4.7500000000 | 2 | 180.0 |      |
| X  | gcd | gcd | X   | 4.0000000000 | 2 | 180.0 |      |
| X  | gcd | gna | X   | 1.7000000000 | 2 | 180.0 |      |
| X  | gcd | gnc | X   | 4.7500000000 | 2 | 180.0 |      |
| X  | gcd | gnd | X   | 4.7500000000 | 2 | 180.0 |      |
| X  | gna | gna | X   | 0.9000000000 | 2 | 0.0   |      |
| X  | gna | gnc | X   | 4.8000000000 | 2 | 180.0 |      |
| X  | gna | gnd | X   | 4.8000000000 | 2 | 180.0 |      |
| X  | gna | gos | X   | 0.6500000000 | 2 | 0.0   |      |
| X  | gnc | gnc | X   | 4.0000000000 | 2 | 180.0 |      |
| X  | gnc | gnd | X   | 4.0000000000 | 2 | 180.0 |      |
| X  | gnc | gos | X   | 4.8000000000 | 2 | 180.0 |      |
| X  | gnd | gnd | X   | 4.0000000000 | 2 | 180.0 |      |
| X  | gos | gos | X   | 1.0000000000 | 1 | 0.0   |      |
| gc | gn  | gc3 | gc  | 0.8000000000 | 1 | 0.0   |      |
| gc | gn  | gc3 | gc  | 0.8500000000 | 2 | 180.0 |      |
| gc | gcd | gca | gca | 2.5500000000 | 2 | 180.0 |      |
| gn | gc3 | gc  | gn  | 1.7000000000 | 1 | 180.0 |      |
| gn | gc3 | gc  | gn  | 2.0000000000 | 2 | 180.0 |      |
| go | gc  | gos | gc3 | 1.4000000000 | 1 | 180.0 |      |

|     |     |     |     |              |   |       |      |
|-----|-----|-----|-----|--------------|---|-------|------|
| go  | gc  | gos | gc3 | 2.7000000000 | 2 | 180.0 |      |
| gc3 | gc3 | gc  | gn  | 0.0700000000 | 2 | 0.0   |      |
| gc3 | gc3 | gc  | gn  | 0.1000000000 | 4 | 0.0   |      |
| gc3 | gc3 | gn  | gc  | 0.1500000000 | 3 | 180.0 |      |
| gc3 | gc3 | gn  | gc  | 0.5000000000 | 4 | 180.0 |      |
| gc3 | gc3 | gn  | gc  | 0.5300000000 | 1 | 0.0   |      |
| gc3 | gc3 | gc3 | gc3 | 0.1800000000 | 3 | 0.0   |      |
| gc3 | gc3 | gc3 | gc3 | 0.2000000000 | 1 | 180.0 |      |
| gc3 | gc3 | gc3 | gc3 | 0.2500000000 | 2 | 180.0 |      |
| gc3 | gc3 | gos | gc  | 0.3830000000 | 3 | 0.0   |      |
| gc3 | gc3 | gos | gc  | 0.8000000000 | 1 | 180.0 |      |
| gc3 | gc3 | gos | gc3 | 0.1000000000 | 2 | 180.0 |      |
| gc3 | gc3 | gos | gc3 | 0.3830000000 | 3 | 0.0   |      |
| gc3 | gos | gc3 | gna | 0.3830000000 | 3 | 0.0   |      |
| gc3 | gos | gc3 | gna | 0.6500000000 | 2 | 0.0   |      |
| gc3 | gos | gc3 | gos | 0.1000000000 | 3 | 0.0   |      |
| gc3 | gos | gc3 | gos | 0.8500000000 | 2 | 180.0 |      |
| gc3 | gos | gc3 | gos | 1.3500000000 | 1 | 180.0 |      |
| gca | gca | gna | gnd | 1.5000000000 | 2 | 180.0 | !DRL |
| gcc | gcd | gca | gca | 2.5500000000 | 2 | 180.0 |      |
| gh1 | gc3 | gc  | go  | 0.0800000000 | 3 | 180.0 |      |
| gh1 | gc3 | gc  | go  | 0.8000000000 | 1 | 0.0   |      |
| gh1 | gc3 | gc3 | gos | 0.2500000000 | 1 | 0.0   |      |
| ghc | gc3 | gc  | go  | 0.0800000000 | 3 | 180.0 |      |
| ghc | gc3 | gc  | go  | 0.8000000000 | 1 | 0.0   |      |
| ghc | gc3 | gc3 | gc3 | 0.1600000000 | 3 | 0.0   |      |
| ghc | gc3 | gc3 | ghc | 0.1500000000 | 3 | 0.0   |      |
| ghc | gc3 | gc3 | gos | 0.2500000000 | 1 | 0.0   |      |
| ghn | gn  | gc  | go  | 2.0000000000 | 1 | 0.0   |      |
| ghn | gn  | gc  | go  | 2.5000000000 | 2 | 180.0 |      |
| gnb | gca | gna | gnd | 1.5000000000 | 2 | 180.0 | !DRL |
| gos | gc3 | gc3 | gos | 0.1440000000 | 3 | 0.0   |      |
| gos | gc3 | gc3 | gos | 1.1750000000 | 2 | 0.0   |      |
| gc3 | gn  | gc3 | gc3 | 0.7          | 3 | 0.0   | !DRL |

IMPR

|    |     |     |     |        |   |     |  |
|----|-----|-----|-----|--------|---|-----|--|
| X  | X   | gc  | go  | 10.500 | 2 | 180 |  |
| X  | X   | gn  | ghn | 1.100  | 2 | 180 |  |
| X  | X   | gca | gha | 1.100  | 2 | 180 |  |
| X  | X   | gca | ghc | 1.100  | 2 | 180 |  |
| X  | X   | gna | ghn | 1.100  | 2 | 180 |  |
| X  | X   | gn  | gc3 | 10.500 | 2 | 180 |  |
| X  | go  | gc  | go  | 10.500 | 2 | 180 |  |
| X  | gc3 | gn  | gc3 | 10.500 | 2 | 180 |  |
| gc | gc3 | gn  | go  | 1.100  | 2 | 180 |  |
| gc | gc3 | gn  | ghn | 1.100  | 2 | 180 |  |
| gc | gca | gca | gc3 | 1.100  | 2 | 180 |  |
| gc | gca | gca | gca | 1.100  | 2 | 180 |  |
| gc | gca | gcd | gcc | 1.100  | 2 | 180 |  |
| X  | X   | gc  | gos | 1.100  | 2 | 180 |  |
| X  | X   | gca | gca | 1.100  | 2 | 180 |  |
| X  | X   | gca | gcc | 1.100  | 2 | 180 |  |
| X  | X   | gca | gcd | 1.100  | 2 | 180 |  |
| X  | X   | gca | gn  | 1.100  | 2 | 180 |  |
| X  | X   | gca | gna | 1.100  | 2 | 180 |  |
| X  | X   | gca | gnb | 1.100  | 2 | 180 |  |
| X  | X   | gca | gnc | 1.100  | 2 | 180 |  |
| X  | X   | gca | gnd | 1.100  | 2 | 180 |  |
| X  | X   | gca | gos | 1.100  | 2 | 180 |  |
| X  | X   | gcc | gcd | 1.100  | 2 | 180 |  |
| X  | X   | gcc | gha | 1.100  | 2 | 180 |  |
| X  | X   | gcc | gn  | 1.100  | 2 | 180 |  |
| X  | X   | gcc | gna | 1.100  | 2 | 180 |  |
| X  | X   | gcc | gnc | 1.100  | 2 | 180 |  |
| X  | X   | gcc | gnd | 1.100  | 2 | 180 |  |
| X  | X   | gcc | go  | 1.100  | 2 | 180 |  |
| X  | X   | gcc | gos | 1.100  | 2 | 180 |  |
| X  | X   | gcd | gcc | 1.100  | 2 | 180 |  |



```

X X gcd gcd 1.100 2 180
X X gcd gha 1.100 2 180
X X gcd gn 1.100 2 180
X X gcd gna 1.100 2 180
X X gcd gnc 1.100 2 180
X X gcd gnd 1.100 2 180
X X gcd go 1.100 2 180
X X gcd gos 1.100 2 180
X X gn gc 1.100 2 180
X X gn gca 1.100 2 180
X X gn gcc 1.100 2 180
X X gn gcd 1.100 2 180
X X gn gn 1.100 2 180
X X gna gca 1.100 2 180
X X gna gcc 1.100 2 180
X X gna gcd 1.100 2 180
X X gna gnc 1.100 2 180
X X gna gnd 1.100 2 180
gc3 gca gca gna 1.100 2 180
gc3 gnc gcc gnd 1.100 2 180
gca gc gca gc3 1.100 2 180
gca gca gca gc3 1.100 2 180
gca gca gca gcd 1.100 2 180
gca gca gca gna 1.100 2 180
gca gca gca gos 1.100 2 180
gca gca gna gc3 1.100 2 180
gca gcd gna gnd 1.100 2 180
gca gh4 gca gnb 1.100 2 180
gca ghc gc go 1.100 2 180
gca gna gca gnb 1.100 2 180
gcd gh4 gcc gna 1.100 2 180
gh5 gna gcd gnc 1.100 2 180
ghc go gc gos 1.100 2 180

```

```

NONBONDED NBXMOD 5 FSHIFT VSWITCH CDIEL -
CUTNB 14.0 CTOFNB 12.0 CTONNB 10.0 EPS 1.0 E14FAC 0.83333333 WMIN 1.4

```

```

gc 0 -0.08600 1.90800 0 -0.04300 1.90800
gn 0 -0.17000 1.82400 0 -0.08500 1.82400
go 0 -0.21000 1.66120 0 -0.10500 1.66120
gc3 0 -0.10940 1.90800 0 -0.05470 1.90800
gca 0 -0.08600 1.90800 0 -0.04300 1.90800
gcc 0 -0.08600 1.90800 0 -0.04300 1.90800
gcd 0 -0.08600 1.90800 0 -0.04300 1.90800
gh1 0 -0.01570 1.38700 0 -0.00785 1.38700
gh4 0 -0.01500 1.40900 0 -0.00750 1.40900
gh5 0 -0.01500 1.35900 0 -0.00750 1.35900
gha 0 -0.01500 1.45900 0 -0.00750 1.45900
ghc 0 -0.01570 1.48700 0 -0.00785 1.48700
ghn 0 -0.01570 0.60000 0 -0.00785 0.60000
gna 0 -0.17000 1.82400 0 -0.08500 1.82400
gnb 0 -0.17000 1.82400 0 -0.08500 1.82400
gnc 0 -0.17000 1.82400 0 -0.08500 1.82400
gnd 0 -0.17000 1.82400 0 -0.08500 1.82400
gos 0 -0.17000 1.68370 0 -0.08500 1.68370

```
